# Supplementary material for: Hepatitis C Virus Screening of High-Risk Patients in a Canadian Emergency Department
Source: Hindawi journal article supplement (doi:10.1155/2020/5258289), 2020-02-18
Supplement: f1 [file 5258289.f1.pdf]

## HEPATITIS C IN THE EMERGENCY DEPARTMENT

We are doing a study at the <study center> screening for Hepatitis C virus infection in emergency department patients. This short survey is **voluntary** and should take **less than 5 minutes** to complete. All answers are strictly **confidential** between your doctors and the research team.

1. Age: \_\_\_\_\_ years

2. Where were you born (city, country)?  
\_\_\_\_\_

3. Have you ever received health or dental care outside of Canada?

NO

YES

*If YES* – which country? \_\_\_\_\_

*If YES* – did you receive a blood transfusion or organ donation?

Yes

No

4. Do any of the following statements apply to you:

➤ *I have been to jail*

➤ *I have used injection drugs*

➤ *I have received a blood transfusion or organ transplant in North America before 1992*

Yes, one or more of the above apply

No, none of the above apply

5. Have you ever been tested for Hepatitis C virus?

YES

*If Yes* – what were the results?

Positive

Negative

I don't know

NO

I don't know

6. Do you have a family doctor that you see regularly?

YES

NO

7. Please check any locations that you have received care in the past 12 months:

None

Regular family doctor

Walk in clinic doctor

CUPS clinic

Urgent care (Sheldon Chumir or South Calgary Urgent Care)

Emergency Department

Other, please specify: \_\_\_\_\_

***Thank you for your participation***

*(NOT GIVEN TO PATIENT)*

**FOR RESEARCH ASSISTANT USE ONLY**

If the patient has indicated YES to survey question #4 please verbally confirm which risk factor(s) is (are) relevant:

- Current use of injection drugs
- Past use of injection drugs
- History of incarceration
- Blood transfusion in North America before 1992
- Organ donation recipient in North America before 1992
- Patient not willing to disclose
